# Supplementary material for: A systematic molecular dynamics study of nearest-neighbor effects on base pair and base pair step conformations and fluctuations in B-DNA
Source: PubMed Central journal article supplement — Nucleic Acids Res. 2009 Oct 22;38(1):299–313. doi: 10.1093/nar/gkp834 (PMC2800215; doi:10.1093/nar/gkp834), 2009-10-22
Supplement: gkp834_1.pdf [file gkp834_1.pdf]

## Supplementary material

Table S1. The 39 oligomers studied. All were simulated using the SPC water model (1) and Dang ion parameters (2). Those with stars were also run with the TIP4PEW water model (3).

| Name  | Sequence           | Duration (ns) |
|-------|--------------------|---------------|
| AAAA* | GCAAAAAAAAAAAAAAGC | 100           |
| AAAC  | GCACAAACAAACAAACGC | 50            |
| AAAT  | GCATAAATAAATAAATGC | 50            |
| AGAG* | GCAGAGAGAGAGAGAGGC | 50            |
| AGCG  | GCCGAGCGAGCGAGCGGC | 50            |
| AGCT  | GCCTAGCTAGCTAGCTGC | 100           |
| AGGA  | GCGAAGGAAGGAAGGAGC | 50            |
| AGGC  | GCGCAGGCAGGCAGGCGC | 50            |
| AGGT  | GCGTAGGTAGGTAGGTGC | 50            |
| AGTC* | GCTCAGTCAGTCAGTCGC | 100           |
| AGTG  | GCTGAGTGAGTGAGTGGC | 100           |
| ATGC  | GCGCATGCATGCATGCGC | 100           |
| CAAG  | GCAGCAAGCAAGCAAGGC | 50            |
| CAAT  | GCATCAATCAATCAATGC | 50            |
| CGCG* | GCCGCGCGCGCGCGCGGC | 100           |
| CGGA* | GCGACGGACGGACGGAGC | 50            |
| CGGC  | GCGCCGGCCGGCCGGCGC | 100           |
| CGGT  | GCGTCGGTCGGTCGGTGC | 50            |
| CGTA* | GCTACGTACGTACGTAGC | 100           |
| CGTG  | GCTGCGTGCGTGCGTGGC | 50            |
| GAAA  | GCAAGAAAGAAAGAAAGC | 100           |
| GAAC  | GCACGAACGAACGAACGC | 100           |
| GAAT  | GCATGAATGAATGAATGC | 100           |
| GATA  | GCTAGATAGATAGATAGC | 50            |
| GGGA  | GCGAGGGAGGGAGGGAGC | 50            |
| GGGC  | GCGCGGGCGGGCGGGCGC | 50            |
| GGGG* | GCGGGGGGGGGGGGGGGC | 50            |

| Name  | Sequence            | Duration (ns) |
|-------|---------------------|---------------|
| GGGT  | GCGTGGGTGGGTGGGTGC  | 50            |
| TAAC  | GCACTAACTAACTAACGC  | 100           |
| TAAG  | GCAGTAAGTAAGTAAGGC  | 100           |
| TAAT  | GCATTAATTAATTAATGC  | 100           |
| TATA* | GCTATATATATATATAGC  | 100           |
| TCGA  | GCGATCGATCGATCGAGC  | 100           |
| TGGA  | GCGATGGATGGATGGAGC  | 50            |
| TGGC  | GCGCTGGCTGGCTGGCGC  | 50            |
| TGGT  | GCGTTGGTTGGTTGGTGC  | 50            |
| TGTA  | GCTATGTATGTATGTAGC  | 50            |
| TGTC  | GCTCTGTCTGTCTGTTCGC | 50            |
| TGTG* | GCTGTGTGTGTGTGTGGC  | 50            |

Table S2. Comparison of averages and standard deviations for the base pair  $A_9$  and the central base pair step  $A_5G_{10}$  parameters within the ACGT oligomer for three simulations: 0-50 ns with SPC/E water; 50-100 ns with SPC/E water; 0-50 ns with TIP4PEW water. In all tables and figures, translational parameters are in Å and rotational parameters are in degrees.

| Parameter   | 0-50 ns SPC/E | 50-100 ns SPC/E | 0-50 ns TIP4PEW |
|-------------|---------------|-----------------|-----------------|
| Shear       | 0.03 ± 0.29   | 0.04 ± 0.29     | 0.02 ± 0.28     |
| Stretch     | 0.03 ± 0.12   | 0.03 ± 0.12     | 0.02 ± 0.12     |
| Stagger     | 0.15 ± 0.40   | 0.14 ± 0.40     | 0.19 ± 0.40     |
| Buckle      | 7.6 ± 9.9     | 6.3 ± 10.9      | 8.1 ± 9.6       |
| Propeller   | -8.5 ± 7.8    | -8.8 ± 8.0      | -8.7 ± 8.1      |
| Opening     | 4.8 ± 5.8     | 4.6 ± 5.7       | 4.5 ± 5.5       |
| Xdisp       | -0.62 ± 0.80  | -0.66 ± 0.76    | -0.69 ± 0.79    |
| Ydisp       | 0.12 ± 0.47   | 0.11 ± 0.48     | 0.02 ± 0.46     |
| Inclination | 5.5 ± 4.8     | 5.3 ± 4.9       | 5.2 ± 4.7       |
| Tip         | 4.8 ± 3.6     | 4.9 ± 3.8       | 5.1 ± 3.6       |
| Axis bend   | 2.0 ± 1.1     | 1.8 ± 1.0       | 1.9 ± 1.0       |
| Shift       | -0.80 ± 0.73  | -0.74 ± 0.74    | -0.78 ± 0.66    |
| Slide       | -0.26 ± 0.56  | -0.27 ± 0.57    | -0.31 ± 0.57    |
| Rise        | 3.43 ± 0.29   | 3.40 ± 0.29     | 3.44 ± 0.28     |
| Tilt        | -4.1 ± 4.0    | -4.0 ± 4.0      | -3.8 ± 3.9      |
| Roll        | 1.0 ± 5.7     | 1.5 ± 5.7       | 0.6 ± 5.4       |
| Twist       | 37.1 ± 5.3    | 36.5 ± 5.6      | 37.4 ± 4.6      |
| $\alpha$    | -75.5 ± 12.9  | -74.7 ± 12.5    | -74.6 ± 12.5    |
| $\beta$     | 169.1 ± 11.2  | 170.2 ± 11.0    | 169.4 ± 10.5    |
| $\gamma$    | 52.3 ± 10.3   | 52.9 ± 10.2     | 53.2 ± 10.2     |
| $\delta$    | 135.4 ± 12.3  | 134.9 ± 13.2    | 134.2 ± 14.2    |
| $\epsilon$  | -113.5 ± 43.3 | -119.4 ± 44.0   | -114.1 ± 44.6   |
| $\zeta$     | 175.8 ± 55.6  | -175.2 ± 57.4   | 176.8 ± 57.1    |
| $\chi$      | -97.7 ± 16.4  | -99.2 ± 16.7    | -98.9 ± 17.5    |
| Phase       | 144.0 ± 19.5  | 144.1 ± 21.7    | 142.7 ± 23.7    |
| Amplitude   | 44.1 ± 6.6    | 43.6 ± 6.7      | 43.8 ± 6.7      |

| <b>Parameter</b>   | <b>0-50 ns SPC/E</b> | <b>50-100 ns SPC/E</b> | <b>0-50 ns TIP4PEW</b> |
|--------------------|----------------------|------------------------|------------------------|
| Minor groove width | 7.47 ± 1.20          | 7.51 ± 1.10            | 7.39 ± 1.11            |
| Minor groove depth | 4.81 ± 0.99          | 4.75 ± 0.93            | 4.91 ± 0.89            |
| Major groove width | 11.39 ± 1.57         | 11.38 ± 1.53           | 11.58 ± 1.52           |
| Major groove depth | 5.54 ± 1.07          | 5.66 ± 1.09            | 5.67 ± 1.18            |

Table S3. Average helical parameters and standard deviations for the A-T and G-C base pairs.

| Base pair   | A-T          | G-C          |
|-------------|--------------|--------------|
| Shear       | 0.10 ± 0.29  | 0.02 ± 0.31  |
| Stretch     | 0.03 ± 0.12  | 0.03 ± 0.11  |
| Stagger     | 0.07 ± 0.42  | 0.10 ± 0.39  |
| Buckle      | 3.7 ± 11.7   | 2.8 ± 12.3   |
| Propeller   | -12.9 ± 9.0  | -9.1 ± 9.2   |
| Opening     | 3.1 ± 5.5    | 1.1 ± 3.3    |
| Xdisp       | -1.45 ± 0.82 | -1.43 ± 0.96 |
| Ydisp       | 0.10 ± 0.53  | 0.00 ± 0.56  |
| Inclination | 6.7 ± 5.5    | 6.9 ± 5.2    |
| Tip         | 0.2 ± 5.0    | 0.5 ± 4.9    |

n.b. Averaging these values for AT and GC base pairs does not give the sequence-averaged parameters listed in Table 1. This is because the signs of shear, buckle, Ydisp and tip change depending on the choice of reference strand - taken here to be the strand carrying the purine. In table 1, since all possible base pairs are considered (AT and TA, GC and CG), the overall average will also include contributions with opposite signs.

Table S4. Average helical parameters and standard deviations for the unique base pair steps

| Step      | Shift        | Slide        | Rise        | Tilt       | Roll       | Twist      |
|-----------|--------------|--------------|-------------|------------|------------|------------|
| <b>GG</b> | -0.18 ± 0.73 | -0.78 ± 0.79 | 3.50 ± 0.33 | 0.0 ± 4.3  | 4.9 ± 5.6  | 33.2 ± 6.0 |
| <b>GA</b> | -0.39 ± 0.71 | -0.14 ± 0.71 | 3.38 ± 0.31 | -1.5 ± 4.5 | 1.7 ± 5.9  | 36.7 ± 6.2 |
| <b>GC</b> | 0.11 ± 0.66  | -0.45 ± 0.58 | 3.46 ± 0.29 | 0.1 ± 4.0  | -1.2 ± 5.8 | 35.6 ± 5.1 |
| <b>GT</b> | -0.11 ± 0.72 | -0.64 ± 0.49 | 3.36 ± 0.31 | 0.7 ± 3.9  | -0.6 ± 5.8 | 32.1 ± 5.0 |
| <b>AT</b> | 0.05 ± 0.66  | -0.82 ± 0.43 | 3.28 ± 0.29 | 0.2 ± 3.8  | -0.5 ± 5.1 | 30.5 ± 4.2 |
| <b>AG</b> | -0.37 ± 0.74 | -0.54 ± 0.65 | 3.38 ± 0.33 | -2.6 ± 4.2 | 3.1 ± 5.9  | 33.6 ± 6.0 |
| <b>AA</b> | -0.33 ± 0.64 | -0.35 ± 0.62 | 3.31 ± 0.29 | -2.5 ± 4.1 | 0.2 ± 5.6  | 35.3 ± 5.5 |
| <b>TG</b> | 0.15 ± 0.73  | -0.21 ± 0.60 | 3.13 ± 0.42 | -0.2 ± 4.8 | 10.3 ± 6.3 | 28.1 ± 9.0 |
| <b>TA</b> | 0.04 ± 0.88  | -0.29 ± 0.71 | 3.18 ± 0.38 | 0.6 ± 5.0  | 10.0 ± 7.4 | 29.2 ± 8.4 |
| <b>CG</b> | 0.06 ± 0.72  | -0.09 ± 0.55 | 3.09 ± 0.45 | 0.4 ± 5.1  | 9.3 ± 6.0  | 28.5 ± 9.9 |

Figure S1. Distributions of helical parameters for  $A_9$  and  $A_9G_{10}$  in the AGTC oligomer: 0-50 ns with SPC/E water (red); 50-100 ns with SPC/E water (blue); 0-50 ns with TIP4PEW water (green). Translational parameters are given in angstroms and rotational parameters in degrees.

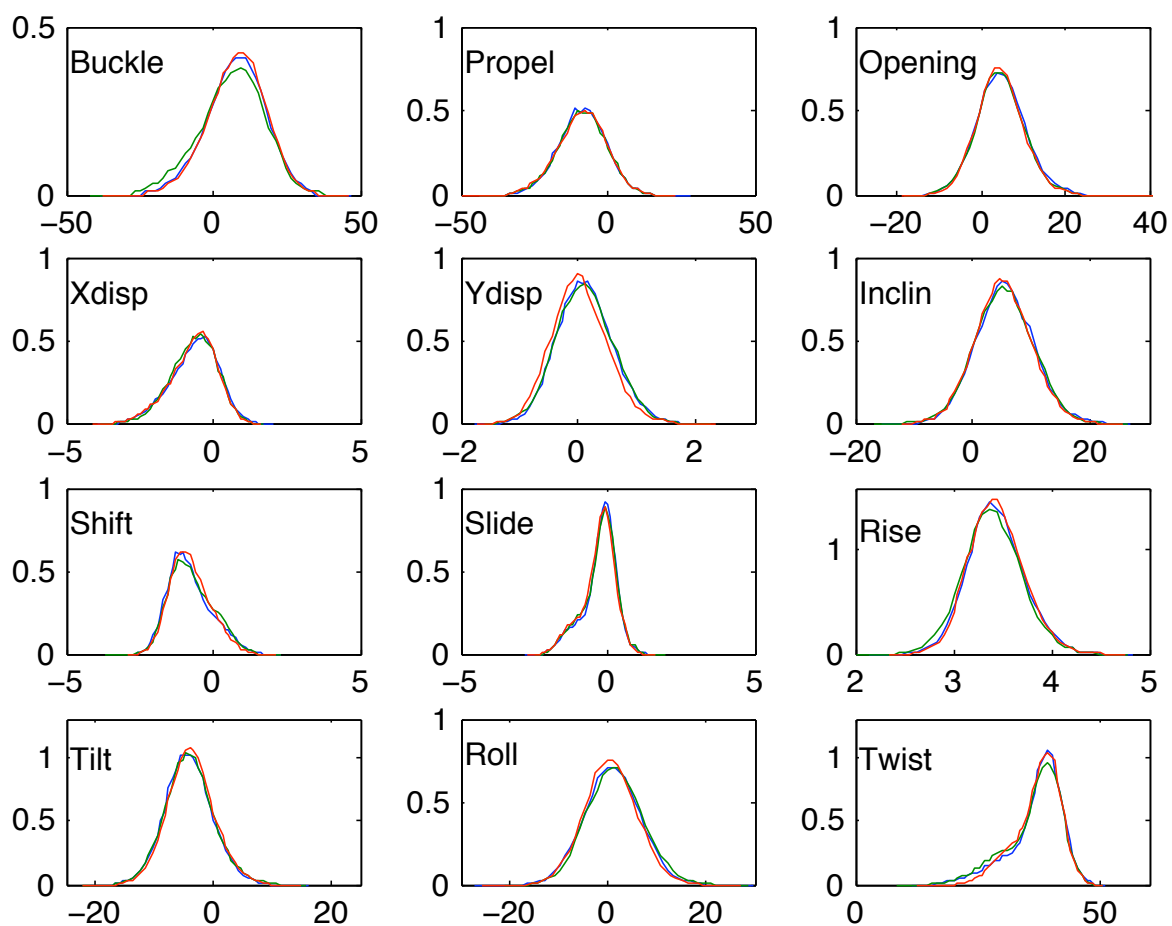

Figure S2. (A) Fluctuation of  $\zeta$  in the Crick strand for step  $C_8G_9$  in the GAAC oligomer. Values around  $270^\circ$  corresponds to BI and values around  $140^\circ$  correspond to BII; (B) Fluctuation of twist for the step  $C_8G_9$  in the GAAC oligomer. Data for over 50000 snapshots (50 ns of simulation).

(A)

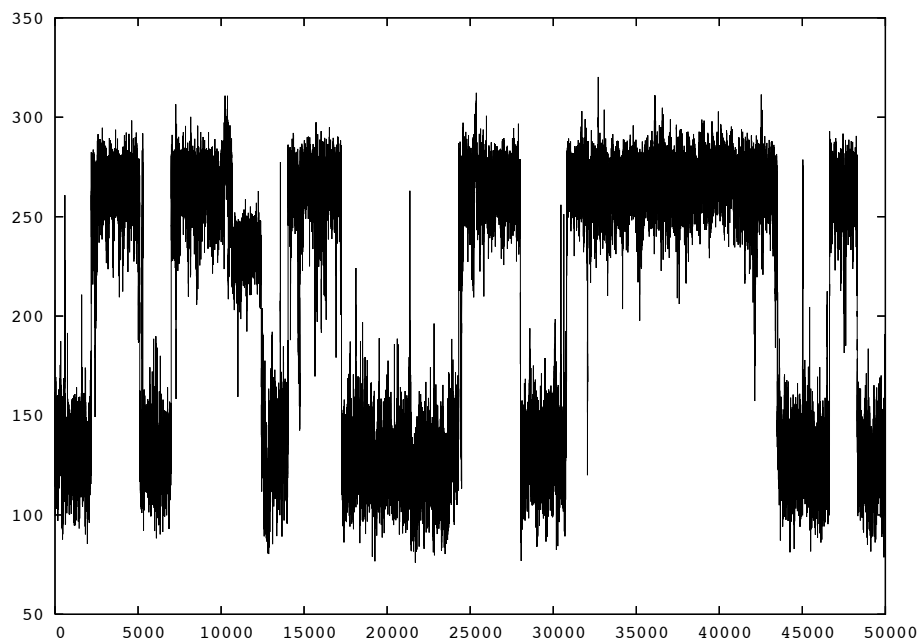

(B)

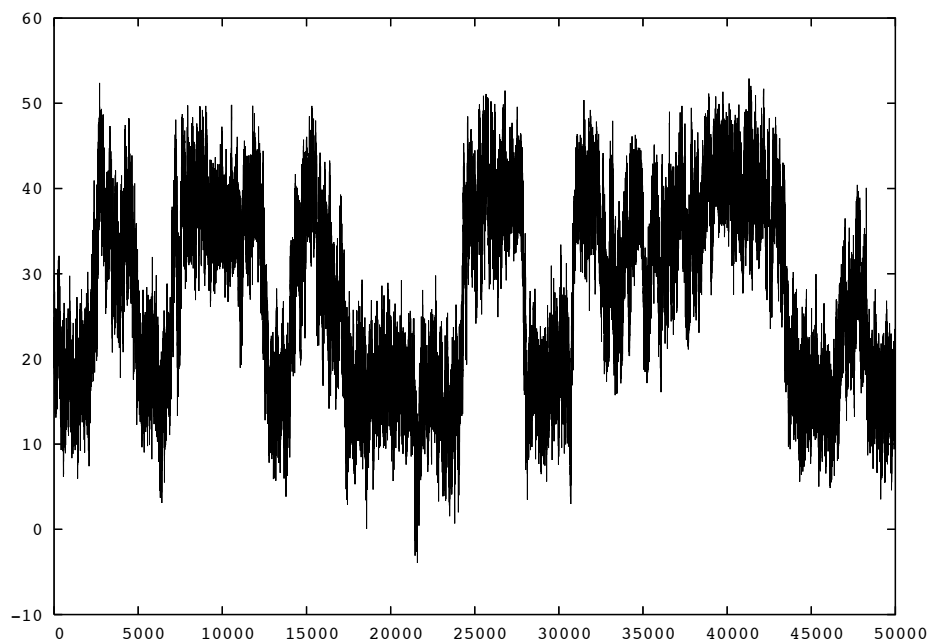

Figure S3. Distributions of helical parameters for the central G base pair and central GT step in three CGTA tetranucleotide fragments in positions 5→8 (red), 9→12 (blue) and 13→16 (green) in the CGTA oligomer. Translational parameters are given in angstroms and rotational parameters in degrees.

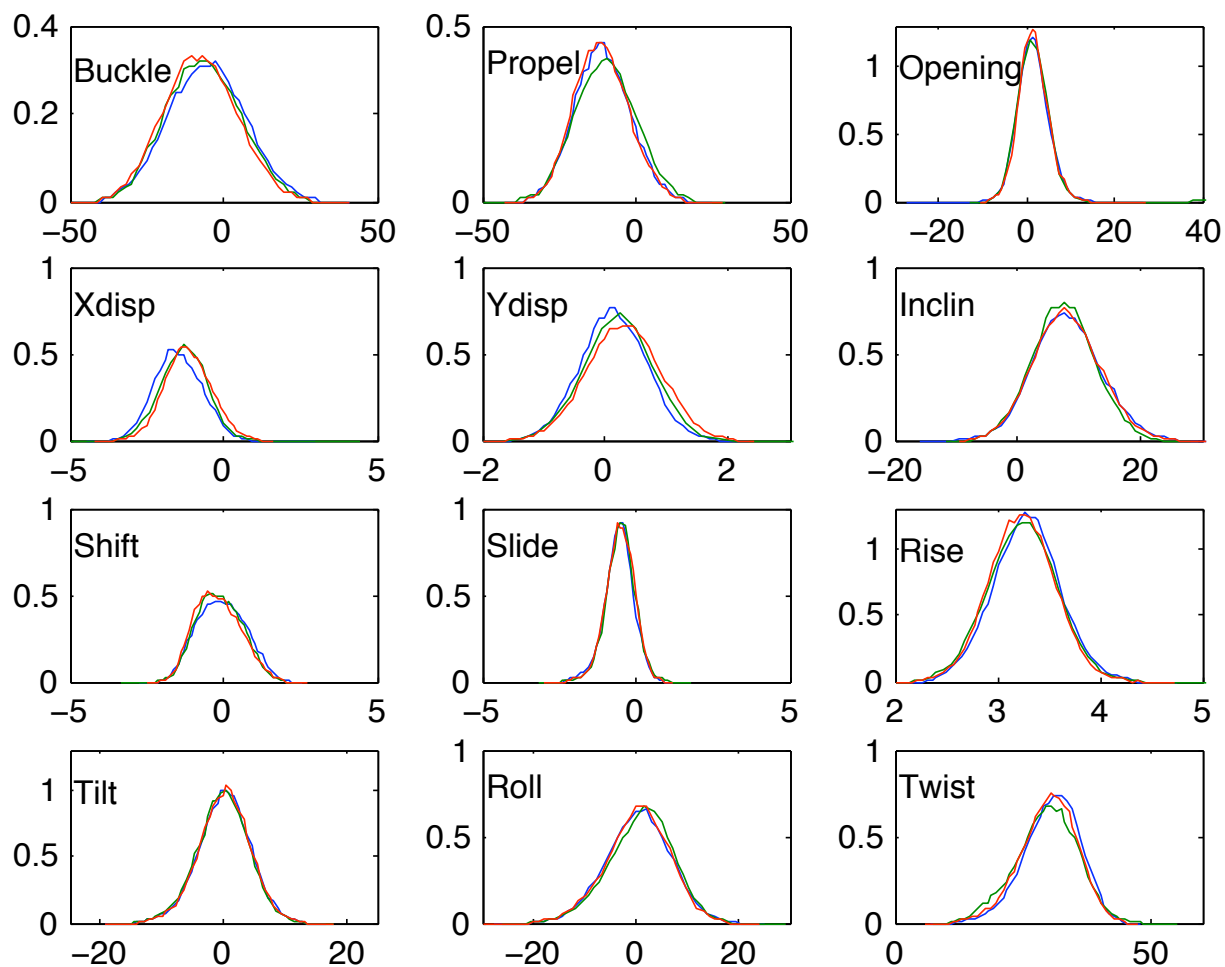



Figure S4. Base pair opening measured using the R(N1)-Y(N3) distance ( $\text{\AA}$ ) for three base pairs in the CGCG oligomer sampled at 100 ps intervals during 50 ns of simulation: G<sub>1</sub> (red), G<sub>6</sub> (green) and C<sub>18</sub> (black). Terminal base pairs, such as G<sub>1</sub> and C<sub>18</sub> can show large, occasionally long-lived openings, but away from the ends the openings are small and rapidly reversible.

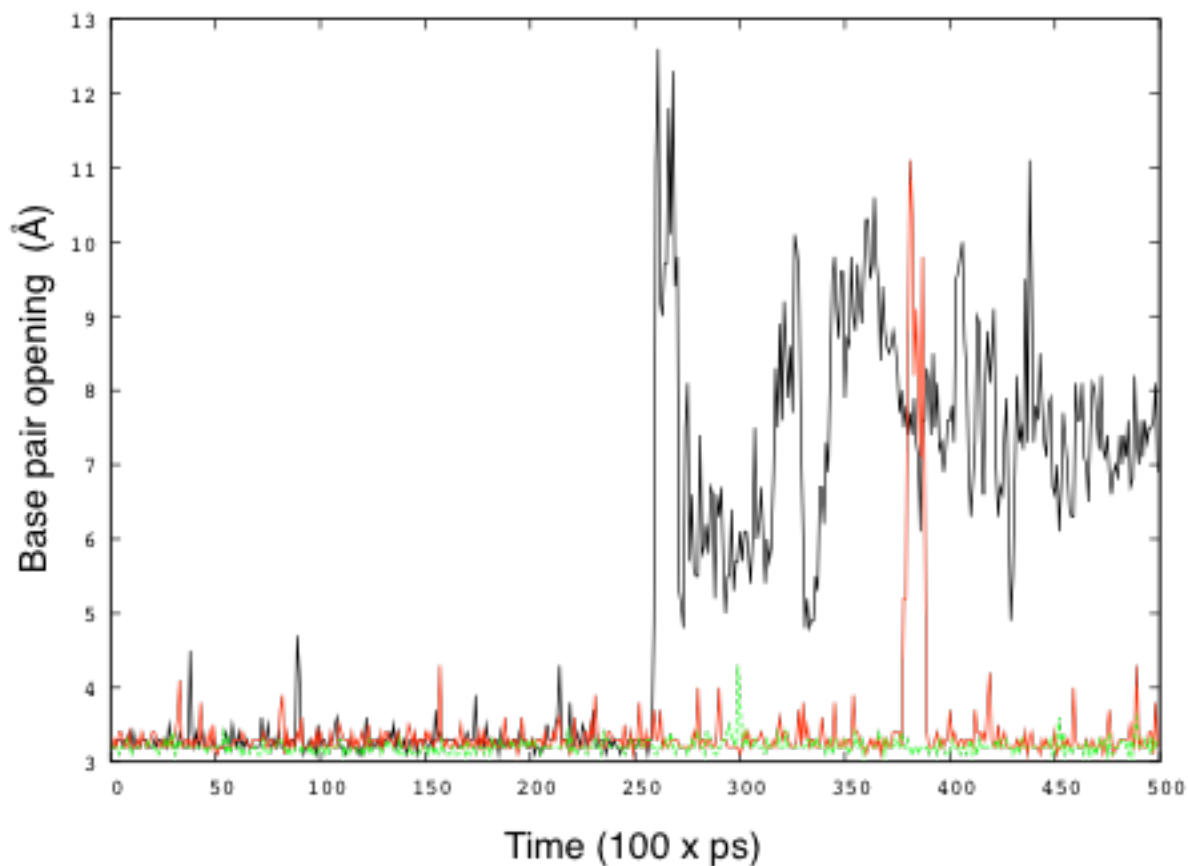

Figure S5. Percentage BII for each base pair step as a function of the nearest-neighbor sequence (in each graphic, the two letter code along the abscissa indicates the 5'- and 3'-flanking bases). Results are given for the Watson strand (red) and the Crick strand (green).

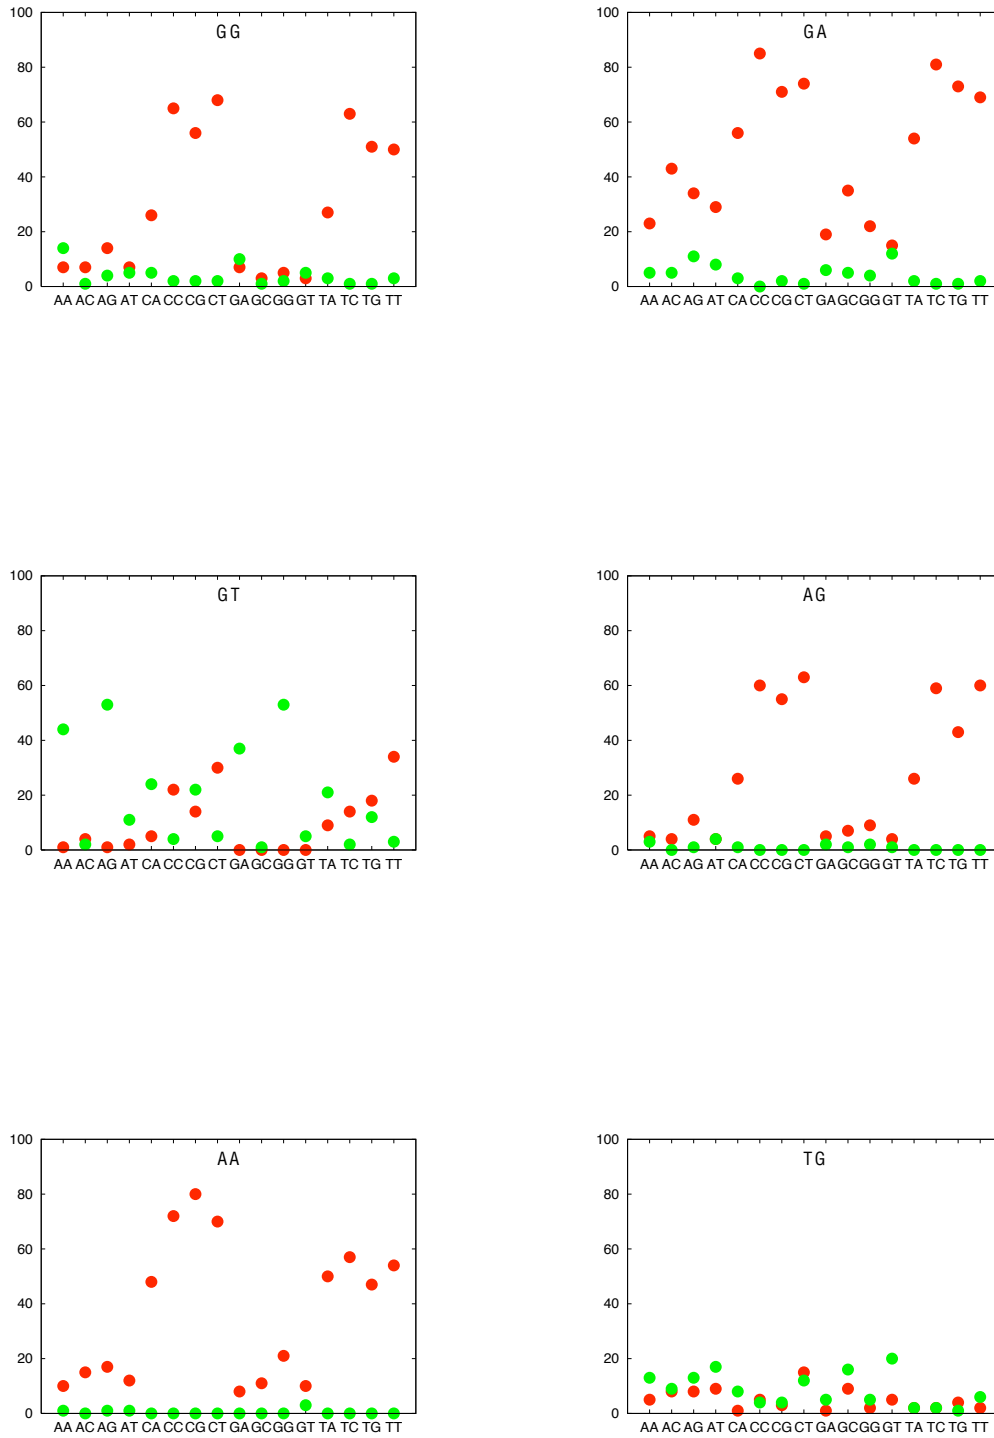

Figure S5 continued.

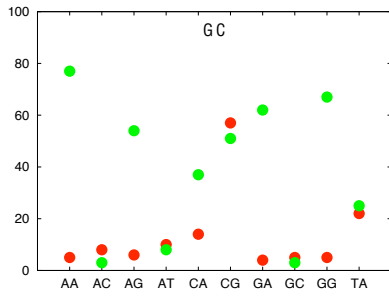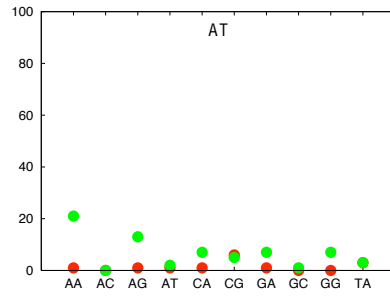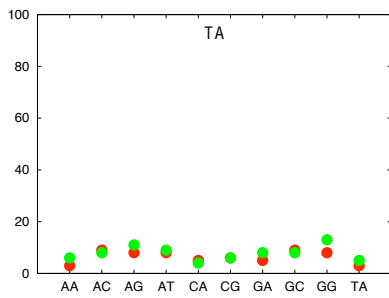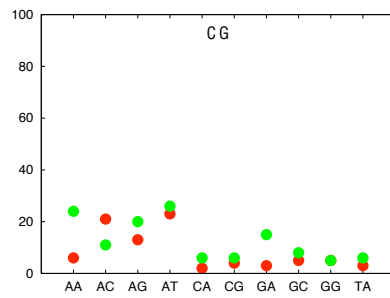

Figure S6. Standard deviations of twist for all base pair steps as a function of the nearest-neighbor sequence (in each graphic, the two letter code along the abscissa indicates the 5'- and 3'-flanking bases).

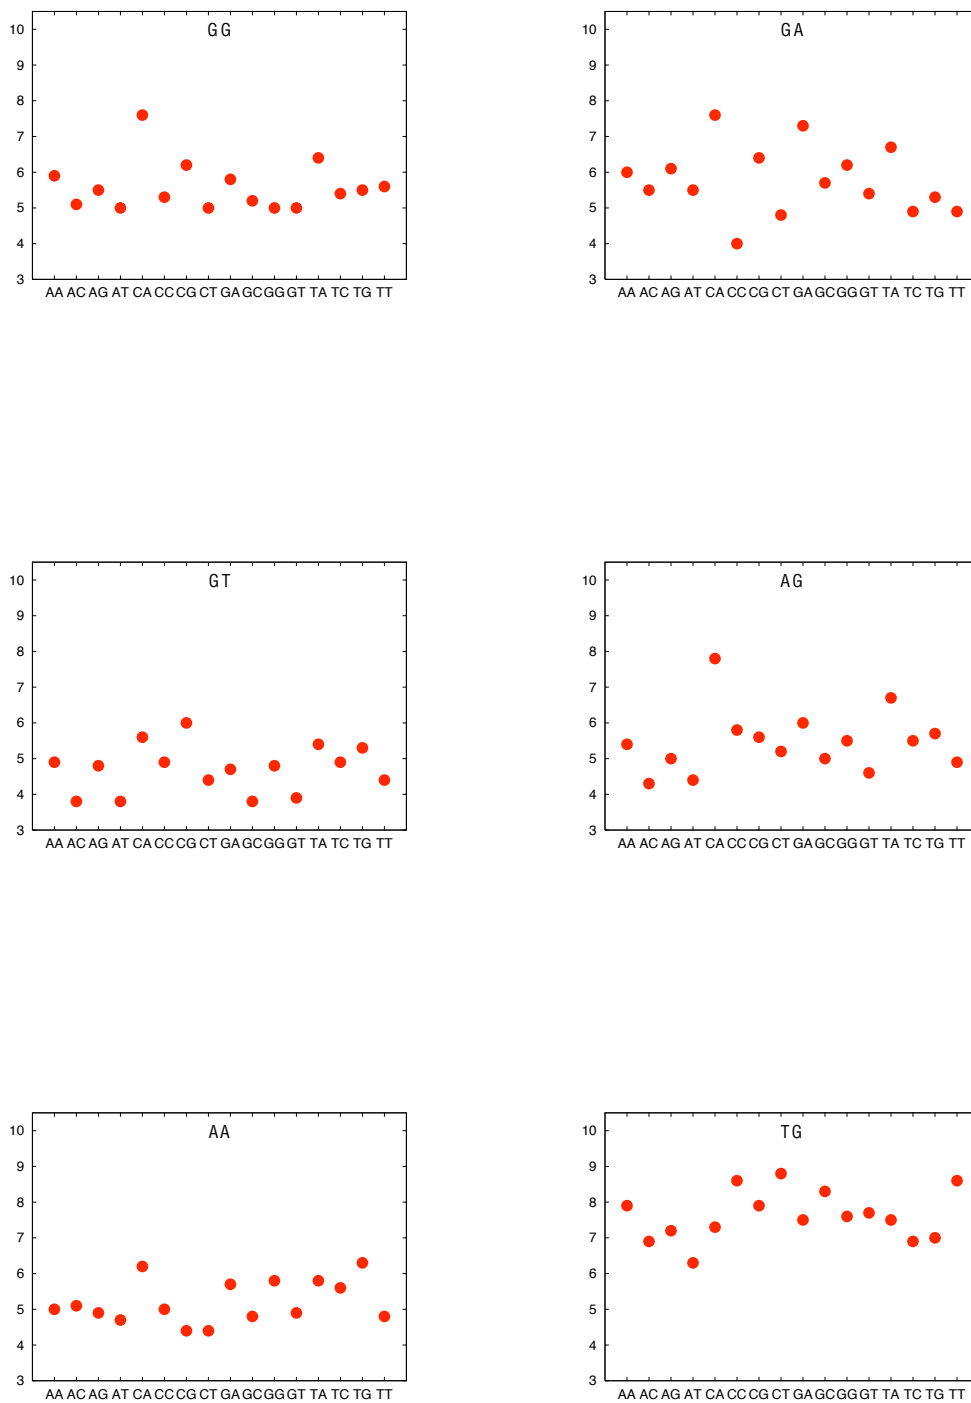

Figure S6. continued.

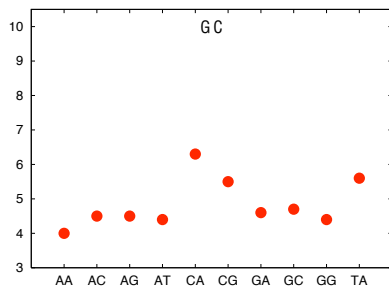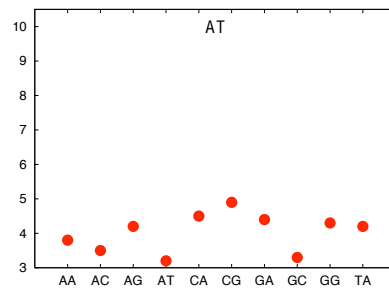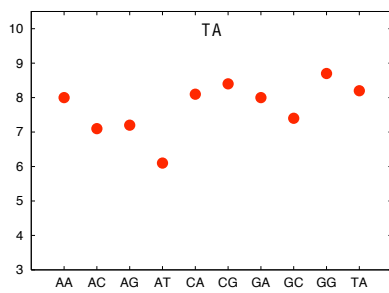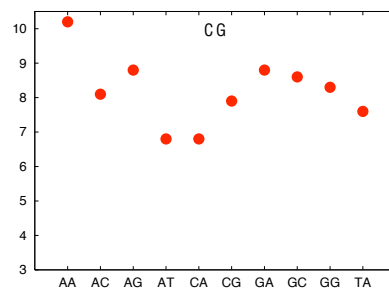

## References

1. Berendsen, H.J.C., Grigera, J.R. and Straatsma, T.P. (1987) The missing term in effective pair potentials. *J. Phys. Chem.*, **91**, 6269-6271.
2. Dang, L.X. (1995) Mechanism and thermodynamics of ion selectivity in aqueous-solutions of 18-crown-6 ether - A molecular dynamics study. *J Am Chem Soc*, **117**, 6954-6960.
3. Horn, H.W., Swope, W.C., Pitner, J.W., Madura, J.D., Dick, T.J., Hura, G.L. and Head-Gordon, T. (2004) Development of an improved four-site water model for biomolecular simulations: TIP4P-Ew. *J Chem Phys*, **120**, 9665-9678.
